# Supplementary material for: Efficacy and safety of Chinese patent medicine (Jinlong capsule) in the treatment of advanced hepatocellular carcinoma: a meta-analysis
Source: Oxford University Press journal article supplement (doi:10.1042/bsr20194019), 2020-01-01
Supplement: bsr-2019-4019_supp.pdf [file bsr-2019-4019_supp.pdf]

|                | Random sequence generation (selection bias) | Allocation concealment (selection bias) | Blinding of participants and personnel (performance bias) | Blinding of outcome assessment (detection bias) | Incomplete outcome data (attrition bias) | Selective reporting (reporting bias) | Other bias |
|----------------|---------------------------------------------|-----------------------------------------|-----------------------------------------------------------|-------------------------------------------------|------------------------------------------|--------------------------------------|------------|
| Dong HT 2008   | +                                           | ?                                       | ?                                                         | ?                                               | +                                        | +                                    | +          |
| Jiang CY 2013  | +                                           | ?                                       | ?                                                         | ?                                               | +                                        | +                                    | +          |
| Li B 2013      | +                                           | ?                                       | ?                                                         | ?                                               | +                                        | ?                                    | ?          |
| Meng P 2016    | +                                           | ?                                       | ?                                                         | ?                                               | +                                        | ?                                    | ?          |
| Tang WH 2015   | +                                           | ?                                       | ?                                                         | ?                                               | +                                        | ?                                    | ?          |
| Wang XH 2009   | +                                           | ?                                       | ?                                                         | ?                                               | +                                        | +                                    | +          |
| Wu GL 2010     | +                                           | ?                                       | ?                                                         | ?                                               | +                                        | ?                                    | +          |
| Xiao ZY 2009   | +                                           | ?                                       | ?                                                         | ?                                               | +                                        | +                                    | +          |
| Xie B 2008     | +                                           | ?                                       | ?                                                         | ?                                               | +                                        | -                                    | +          |
| Xie YF 2003    | +                                           | ?                                       | ?                                                         | ?                                               | +                                        | +                                    | +          |
| Yang PY 2013   | +                                           | ?                                       | ?                                                         | ?                                               | +                                        | ?                                    | +          |
| Ye X 2008      | +                                           | ?                                       | ?                                                         | ?                                               | +                                        | ?                                    | +          |
| Yin LJ 2008    | +                                           | ?                                       | ?                                                         | ?                                               | +                                        | +                                    | +          |
| Yuan TW 2013   | +                                           | ?                                       | ?                                                         | ?                                               | +                                        | -                                    | +          |
| Zeng BZ 2010   | +                                           | ?                                       | ?                                                         | ?                                               | +                                        | +                                    | +          |
| Zeng CS 2012   | +                                           | ?                                       | ?                                                         | ?                                               | +                                        | ?                                    | +          |
| Zeng CS 2014   | +                                           | ?                                       | ?                                                         | ?                                               | +                                        | -                                    | +          |
| Zhang SZ 2012  | +                                           | ?                                       | ?                                                         | ?                                               | +                                        | +                                    | +          |
| Zhang XQ 2012B | +                                           | ?                                       | ?                                                         | ?                                               | +                                        | +                                    | +          |
| Zheng C 2018   | +                                           | ?                                       | ?                                                         | ?                                               | +                                        | +                                    | +          |
| Zhu X 2003     | +                                           | ?                                       | ?                                                         | ?                                               | +                                        | ?                                    | +          |

**Supplementary Figure 1.** Risk of bias summary: review of authors' judgments about each risk of bias item for included studies. **Note:** Each color represents a different level of bias: red for high-risk, green for low-risk, and yellow for unclear-risk of bias.

A

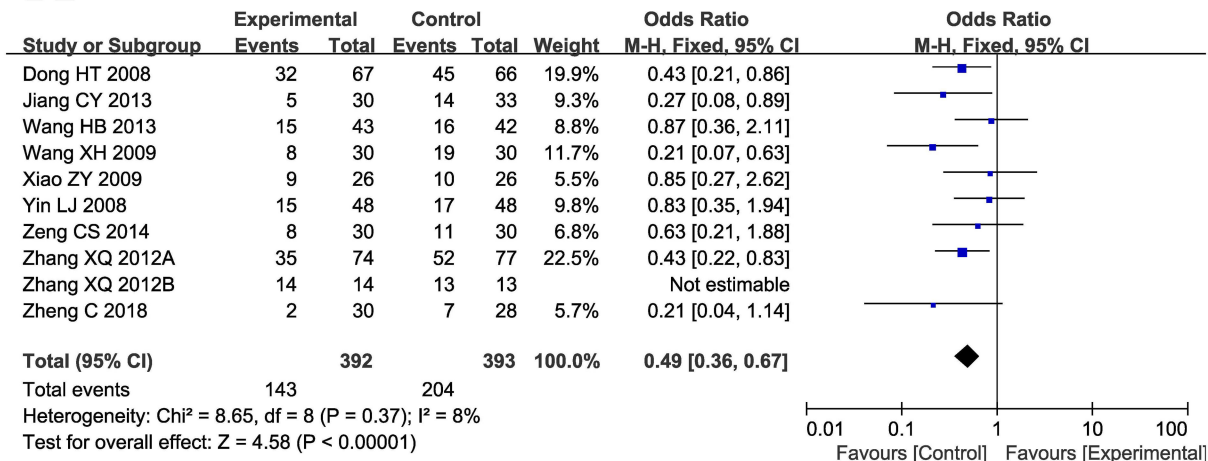

B

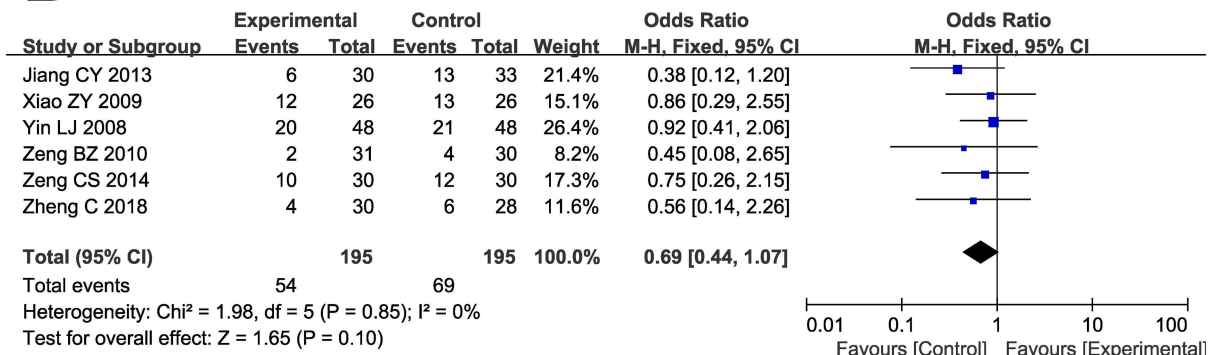

C

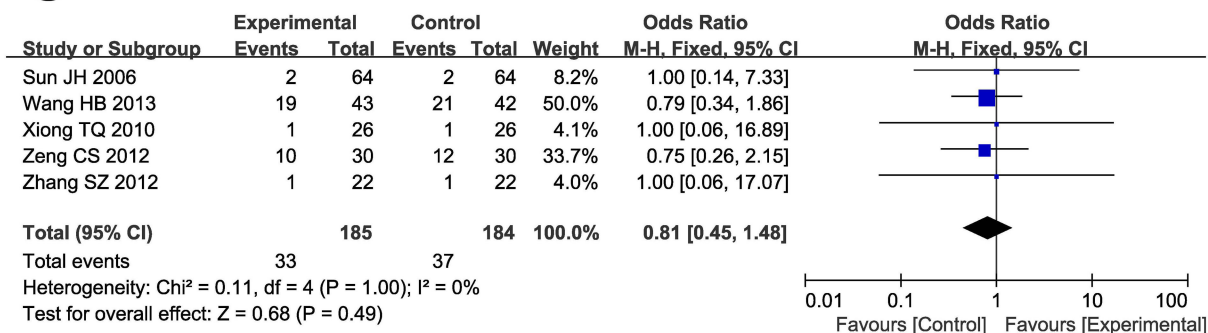

D

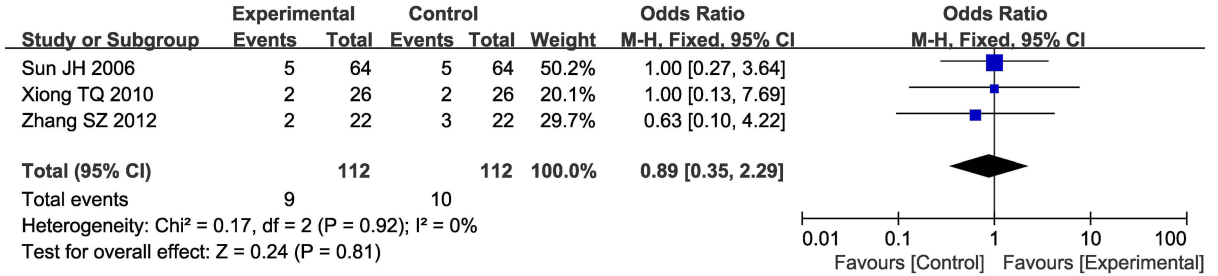

E

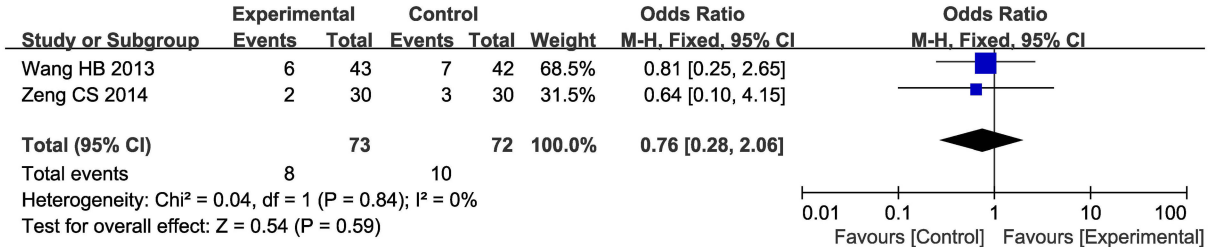

F

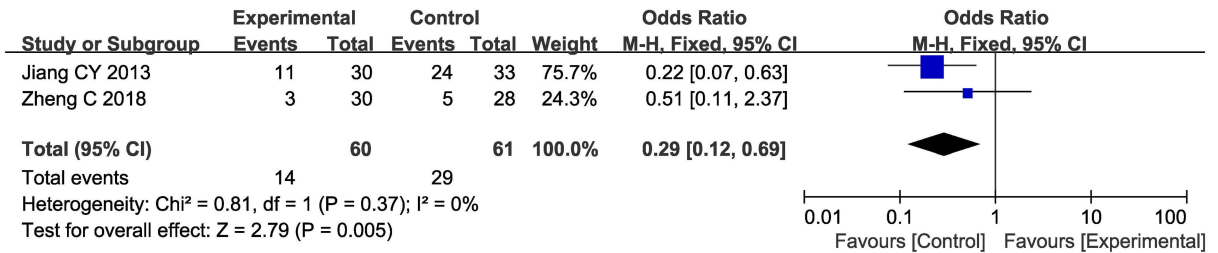

G

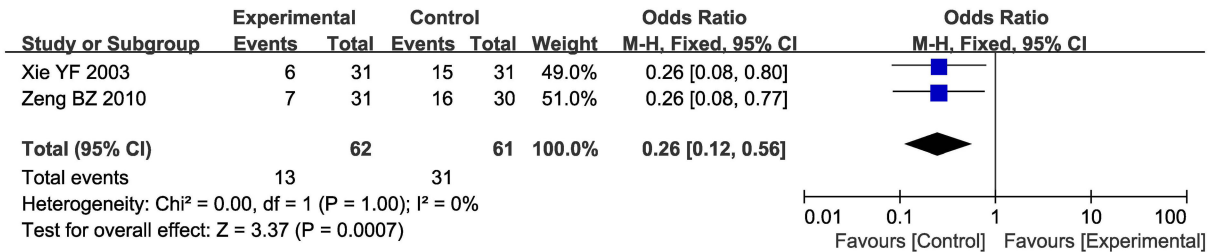

H

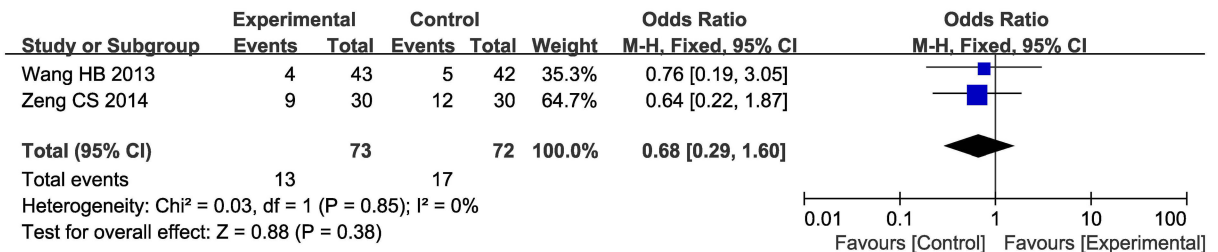

**Supplementary Figure 2.** Forest plot of the comparison of adverse effects including leukopenia (A), gastrointestinal adverse effects (B), nausea and vomiting (C), anorexia (D), thrombocytopenia (E), hepatotoxicity (F), myelosuppression (G) and anemia (H) between the experimental and control group. Control group, conventional treatment alone group; Experimental group, conventional treatment and JLC combined group; JLC, Jinlong capsule. The fixed-effects meta-analysis model (Mantel–Haenszel method) was used.

**A**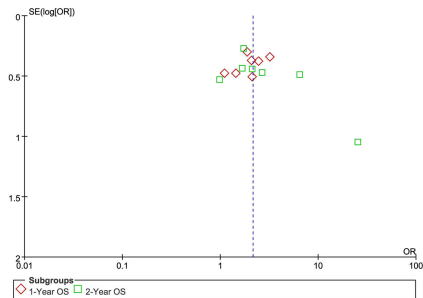**B**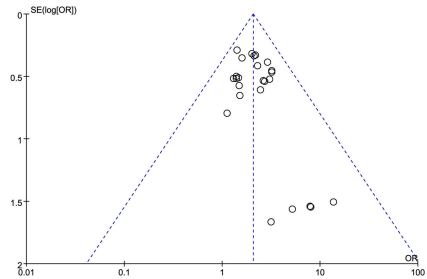**C**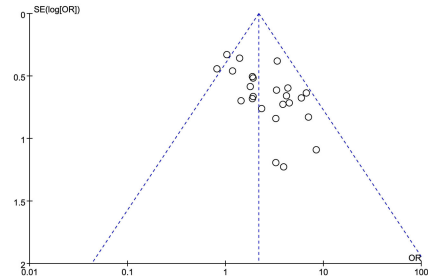**D**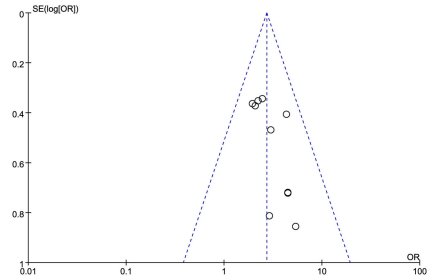**E**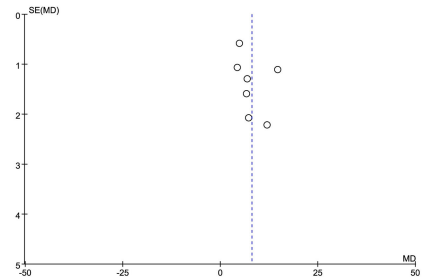**F**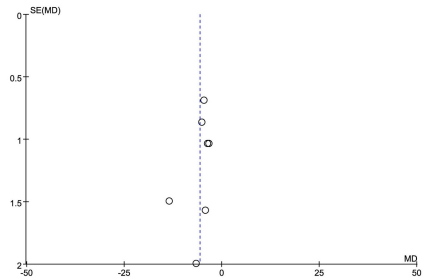**G**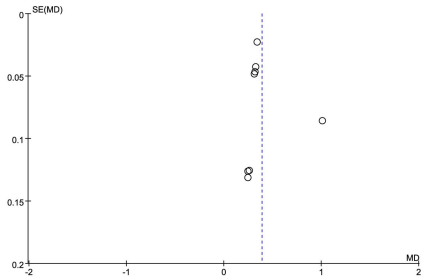**H**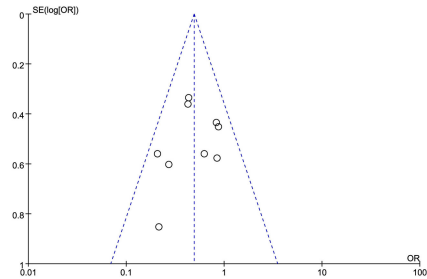

**Supplementary Figure 3.** Funnel plot of 12- and 24-month overall survival (OS, A), overall response rate (ORR, B), disease control rate (DCR, C), quality of life improved rate (QIR, D), CD4<sup>+</sup> (E), CD8<sup>+</sup> (F), CD4<sup>+</sup>/CD8<sup>+</sup> (G), and leukopenia (H).

**Supplementary Table 1.** Quality assessment of non-randomized comparative studies

| Study                         | Non-randomized studies |   |   |   |   |   |   | Additional criteria in comparative study |   |   |   |   | Total |
|-------------------------------|------------------------|---|---|---|---|---|---|------------------------------------------|---|---|---|---|-------|
|                               | A                      | B | C | D | E | F | G | H                                        | I | J | K | L |       |
| Jia CH 2008 <sup>[19]</sup>   | 2                      | 1 | 2 | 1 | 2 | 1 | 2 | 0                                        | 2 | 2 | 2 | 2 | 19    |
| Li H 2007 <sup>[23]</sup>     | 2                      | 1 | 2 | 1 | 1 | 2 | 2 | 0                                        | 2 | 2 | 2 | 2 | 19    |
| Liang TJ 2005 <sup>[24]</sup> | 2                      | 1 | 2 | 1 | 2 | 2 | 2 | 0                                        | 2 | 2 | 2 | 2 | 20    |
| Liu ZY 2015 <sup>[25]</sup>   | 2                      | 1 | 2 | 1 | 2 | 1 | 2 | 0                                        | 2 | 2 | 2 | 2 | 19    |
| Sun JH 2006 <sup>[27]</sup>   | 2                      | 1 | 2 | 2 | 2 | 2 | 2 | 0                                        | 2 | 2 | 2 | 2 | 21    |
| Wang HB 2013 <sup>[29]</sup>  | 2                      | 1 | 2 | 2 | 2 | 2 | 2 | 0                                        | 2 | 2 | 2 | 2 | 21    |
| Xiong TQ 2010 <sup>[34]</sup> | 2                      | 1 | 2 | 2 | 2 | 1 | 2 | 0                                        | 2 | 2 | 2 | 2 | 20    |
| Zhang XQ 2012 <sup>[43]</sup> | 2                      | 1 | 2 | 2 | 2 | 2 | 2 | 0                                        | 2 | 2 | 2 | 2 | 21    |

**Notes:** The items are scored 0 (not reported), 1 (reported but inadequate) and 2 (reported and adequate).

A: A clearly stated aim; B: Inclusion of consecutive patients; C: Prospective collection of data; D: Endpoints appropriate to the aim of the study; E: Unbiased assessment of the study endpoint; F: Follow-up period appropriate to the aim of the study; G: Loss to follow up less than 5%; H: Prospective calculation of the study size; I: An adequate control group; J: Contemporary groups; K: Baseline equivalence of groups; L: Adequate statistical analyses.



**Supplementary Table 2.** Publication bias on therapeutic efficacy indexes (OS, ORR, DCR and QIR), immune function indexes (CD4<sup>+</sup>, CD8<sup>+</sup>, and CD4<sup>+</sup>/CD8<sup>+</sup>) and leucopenia.

| Publication Bias              | Therapeutic efficacy indexes |             |             |             |             | Immune function indexes |                  |                                    | Adverse events |
|-------------------------------|------------------------------|-------------|-------------|-------------|-------------|-------------------------|------------------|------------------------------------|----------------|
|                               | 12-month OS                  | 24-month OS | ORR         | DCR         | QIR         | CD4 <sup>+</sup>        | CD8 <sup>+</sup> | CD4 <sup>+</sup> /CD8 <sup>+</sup> | Leucopenia     |
| <b>Begg</b>                   | 0.764                        | 0.133       | 0.168       | 0.035       | 0.107       | 0.133                   | 0.548            | 0.902                              | 0.675          |
| <b>Egger</b>                  | 0.301                        | 0.161       | 0.049       | 0.001       | 0.036       | 0.321                   | 0.331            | 0.603                              | 0.542          |
| <b>Trim and fill analysis</b> |                              |             |             |             |             |                         |                  |                                    |                |
| before                        |                              |             | $P < .0001$ | $P < .0001$ | $P < .0001$ |                         |                  |                                    |                |
| after                         |                              |             | $P < .0001$ | $P < .0001$ | $P < .0001$ |                         |                  |                                    |                |

**Notes:** Parameters discussed in over 7 papers were conducted bias analyses.

**Abbreviations:** OS: overall survival; ORR: overall response rate; DCR: disease control rate; QIR: quality of life improved rate.

**Supplementary Table 3.** Subgroup analyses of ORR and DCR between the experimental and control group.

| Parameter | Factors                | Patients | Analysis | Heterogeneity      |         | Odds  | 95% CI     | P-value  |
|-----------|------------------------|----------|----------|--------------------|---------|-------|------------|----------|
|           | at study level         | Con/Exp  | method   | I <sup>2</sup> (%) | P-value | Ratio |            |          |
| ORR       | Therapeutic regimen    |          |          |                    |         |       |            |          |
|           | JLC+TACE               | 739/719  | Fixed    | 0                  | 0.96    | 1.93  | 1.56-2.38  | <0.00001 |
|           | JLC+SST                | 157/157  | Fixed    | 0                  | 0.97    | 7.37  | 1.91-28.36 | 0.004    |
|           | JLC+RT                 | 117/116  | Fixed    | 0                  | 0.93    | 3.02  | 1.72-5.31  | 0.0001   |
|           | Study sample size      |          |          |                    |         |       |            |          |
|           | >80                    | 719/683  | Fixed    | 0                  | 0.83    | 2.06  | 1.64-2.59  | <0.00001 |
|           | <80                    | 379/380  | Fixed    | 0                  | 0.89    | 2.06  | 1.48-2.88  | <0.0001  |
|           | Type of control trials |          |          |                    |         |       |            |          |
|           | RCTs                   | 677/654  | Fixed    | 0                  | 0.93    | 2.06  | 1.63-2.61  | <0.00001 |
|           | non-RCTs               | 421/409  | Fixed    | 0                  | 0.69    | 2.07  | 1.52-2.82  | <0.00001 |
| DCR       | Therapeutic regimen    |          |          |                    |         |       |            |          |
|           | JLC+TACE               | 672/653  | Fixed    | 6                  | 0.39    | 1.66  | 1.26-2.18  | 0.0003   |
|           | JLC+SST                | 157/157  | Fixed    | 0                  | 0.65    | 3.90  | 2.42-6.29  | <0.00001 |
|           | JLC+RT                 | 117/116  | Fixed    | 0                  | 0.76    | 4.50  | 1.46-13.86 | 0.009    |
|           | Study sample size      |          |          |                    |         |       |            |          |
|           | >80                    | 652/617  | Fixed    | 24                 | 0.23    | 1.62  | 1.22-2.15  | 0.0009   |
|           | <80                    | 379/380  | Fixed    | 0                  | 0.91    | 3.46  | 2.40-4.99  | <0.00001 |
|           | Type of control trials |          |          |                    |         |       |            |          |
|           | RCTs                   | 610/588  | Fixed    | 0                  | 0.83    | 2.48  | 1.84-3.33  | <0.00001 |
|           | non-RCTs               | 421/409  | Random   | 63                 | 0.01    | 2.09  | 1.11-3.94  | 0.02     |

**Notes:** Con, Control group (Conventional treatment alone group); Exp, Experimental group (Conventional treatment and JLC combined group).

**Abbreviations:** ORR: overall response rate; DCR: disease control rate; JLC: Jinlong capsule; TACE: transcatheter arterial chemoembolization; SST: Support and symptomatic treatment; RT: Radiotherapy; RCTs; randomized controlled trials.
